# Supplementary material for: 性别与权力——从叙事角度看《我的安东尼亚》中沉默的女性声音
Source: MDPI journal article supplement (doi:10.3390/mi12070832), 2010-01-01
Supplement: s1 [file s1]

## Table of Contents

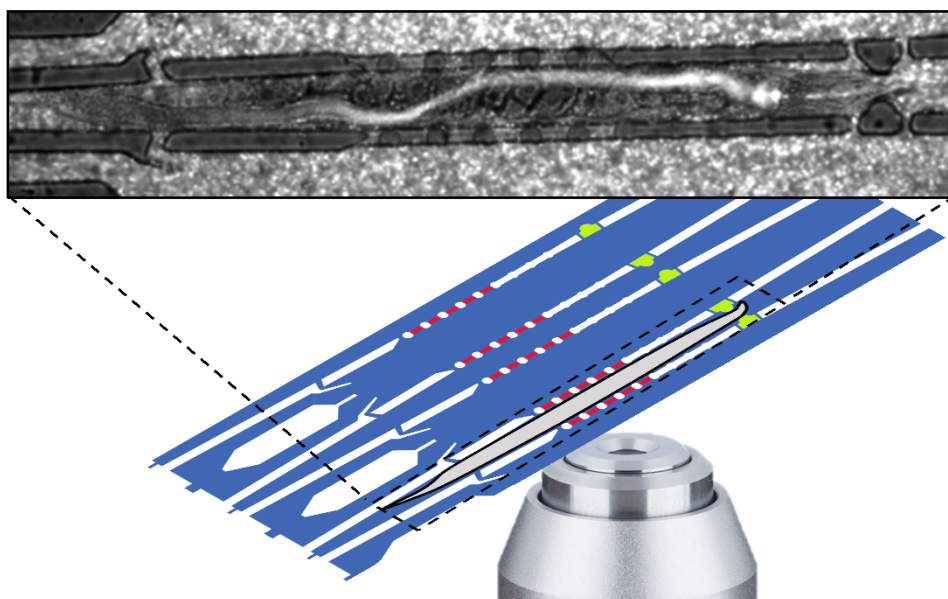

We present a microfluidic device to study *in vivo* bacterial load dynamics and food absorption in the intestine of *Caenorhabditis elegans*.
